# Supplementary material for: Processing and Characterization of Bioplastics from the Invasive Seaweed Rugulopteryx okamurae
Source: MDPI journal article supplement (doi:10.3390/polym14020355), 2022-01-17
Supplement: s1 [file s1]

Supplementary Material

# Processing and Characterization of Bioplastics from the Invasive Seaweed *Rugulopteryx okamurae*

Ismael Santana, Manuel Félix, Antonio Guerrero and Carlos Bengoechea \*

Higher Polytechnic School, University of Seville; isantana@us.es (I.S.); mfelix@us.es (M.F.); aguerrero@us.es (A.G.)

\* Correspondence: cbengoechea@us.es; Tel.: +(34)-954-557-179

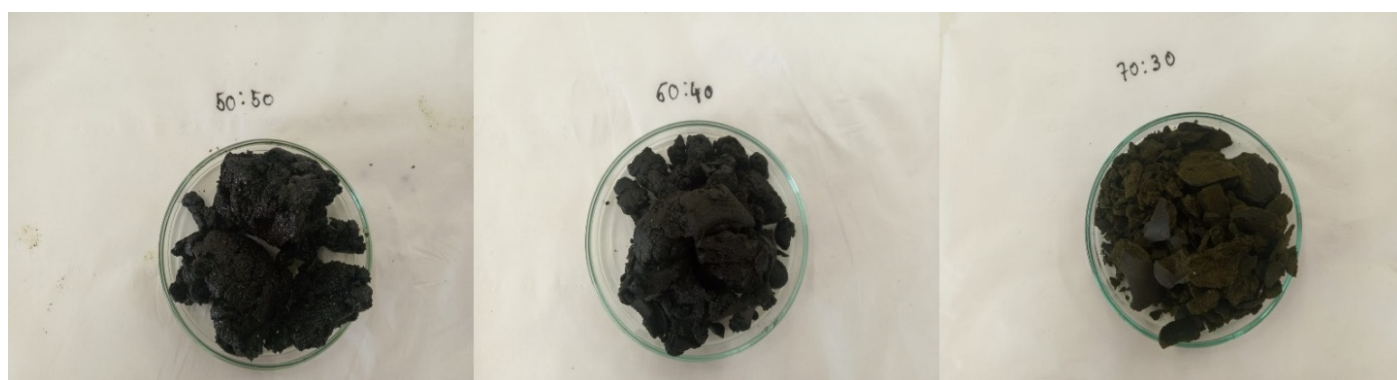

**Figure S1.** Visual appearance of RO/GLY blends at different ratios (from left to right: 50/50, 60/40, 70/30).

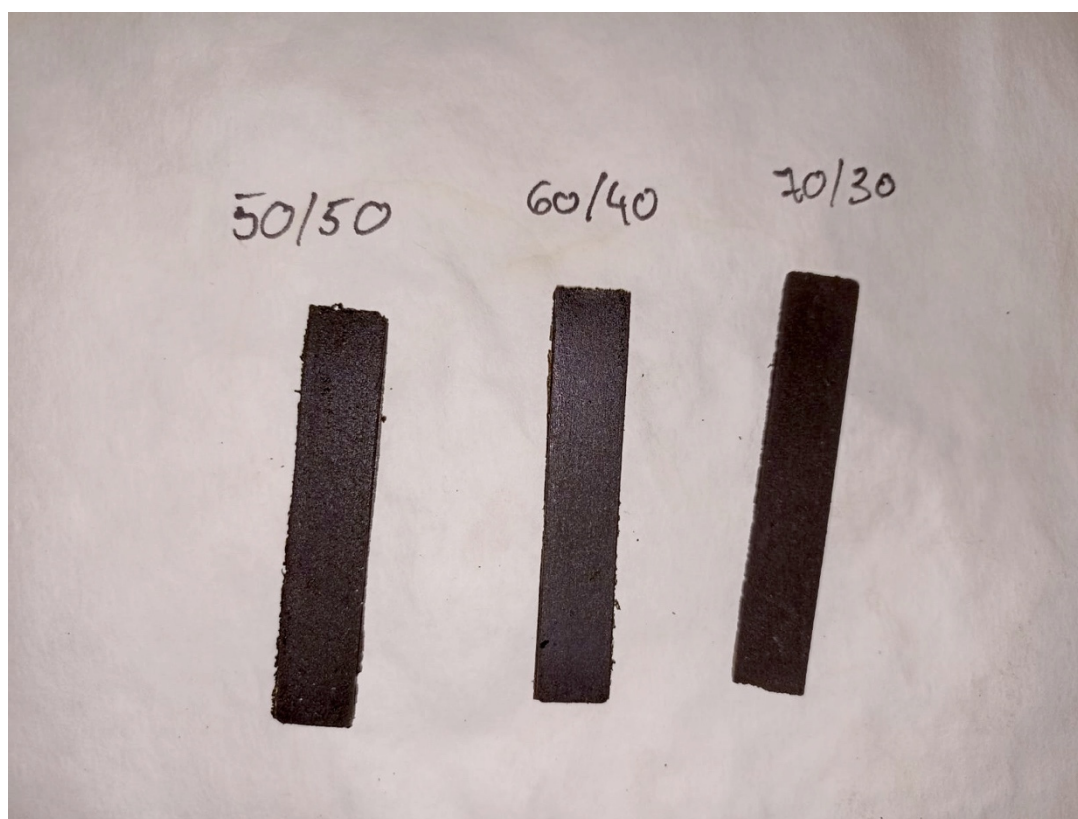

**Figure S2.** Visual appearance of RO/GLY bioplastics at different ratios (from left to right: 50/50, 60/40, 70/30) molded at 120 °C.
